# Supplementary material for: Consolidative Radiotherapy for Metastatic Urothelial Bladder Cancer Patients with No Progression and with No More than Five Residual Metastatic Lesions Following First-Line Systemic Therapy: A Retrospective Analysis
Source: MDPI journal article supplement (doi:10.3390/cancers15041161), 2023-02-11
Supplement: s1 [file s1]

Supplementary Table S1 Univariable and multivariable analysis for progression free survival (whole population)

| Variable                                                           |              | Univariable        |         | Multivariable      |         |
|--------------------------------------------------------------------|--------------|--------------------|---------|--------------------|---------|
|                                                                    |              | HR (95% CI)        | p-value | HR (95% CI)        | p-value |
| Sex                                                                | Male         | 1                  |         |                    |         |
|                                                                    | Female       | 0.51 (0.22 – 1.18) | 0.109   |                    |         |
| Presence of histological variant                                   | No           | 1                  |         |                    |         |
|                                                                    | Yes          | 1.03 (0.54 – 1.96) | 0.927   |                    |         |
| Presence of CIS                                                    | No           | 1                  |         |                    |         |
|                                                                    | Yes          | 1.54 (0.83 – 2.86) | 0.167   |                    |         |
| T clinical status at diagnosis                                     | T1-T2        | 1                  |         |                    |         |
|                                                                    | T3-T4        | 1.04 (0.60 – 1.81) | 0.888   |                    |         |
| N clinical status at diagnosis                                     | N0           | 1                  |         |                    |         |
|                                                                    | N+           | 0.97 (0.62 – 1.52) | 0.896   |                    |         |
| Metastatic presentation                                            | Synchronous  | 1                  |         |                    |         |
|                                                                    | Metachronous | 1.28 (0.82 – 2.00) | 0.277   |                    |         |
| Time from diagnosis to metastasis                                  | < 24 months  | 1                  |         | 1                  |         |
|                                                                    | ≥ 24 months  | 1.80 (1.02 – 3.20) | 0.040   | 1.24 (0.67 – 2.31) | 0.49    |
| Number of metastatic lesions at metastatic presentation            | ≤ 3          | 1                  |         |                    |         |
|                                                                    | > 3          | 1.06 (0.66 – 1.71) | 0.797   |                    |         |
| Lung metastatic lesion                                             | No           | 1                  |         |                    |         |
|                                                                    | Yes          | 0.95 (0.54 – 1.67) | 0.852   |                    |         |
| Liver metastatic lesion                                            | No           | 1                  |         | 1                  |         |
|                                                                    | Yes          | 2.60 (1.23 – 5.47) | 0.009   | 2.31 (1.07 – 5.03) | 0.034   |
| Extra-pelvic node only *                                           | No           | 1                  |         | 1                  |         |
|                                                                    | Yes          | 0.68 (0.41 – 1.10) | 0.113   | 0.81 (0.49 – 1.35) | 0.422   |
| Number of residual metastatic lesions following first-line therapy | 0            | 1                  |         |                    |         |
|                                                                    | 1            | 1.11 (0.60 – 2.08) |         |                    |         |
|                                                                    | ≥ 2          | 1.41 (0.82 – 2.40) | 0.420   |                    |         |
| Local consolidative radiotherapy                                   | No (NIR)     | 1                  |         | 1                  |         |
|                                                                    | Yes (IR)     | 0.45 (0.28 – 0.73) | 0.001   | 0.49 (0.29 – 0.82) | 0.007   |

\* extra-pelvic nodes are the only sites of metastases. Abbreviations : NIR (no irradiation) ; IR (radiotherapy).

Supplementary Table S2 Univariable and multivariable analysis for overall survival (whole population)

| Variable                          |              | Univariable        |         | Multivariable      |         |
|-----------------------------------|--------------|--------------------|---------|--------------------|---------|
|                                   |              | HR (95% CI)        | p-value | HR (95% CI)        | p-value |
| Sex                               | Male         | 1                  |         |                    |         |
|                                   | Female       | 0.53 (0.21 – 1.33) | 0.171   |                    |         |
| Presence of histological variant  | No           | 1                  |         |                    |         |
|                                   | Yes          | 1.06 (0.52 – 2.16) | 0.881   |                    |         |
| Presence of CIS                   | No           | 1                  |         | 1                  |         |
|                                   | Yes          | 1.73 (0.90 – 3.32) | 0.098   | 1.49 (0.76 – 2.91) | 0.244   |
| T clinical status at diagnosis    | T1-T2        | 1                  |         |                    |         |
|                                   | T3-T4        | 1.09 (0.59 – 2.01) | 0.784   |                    |         |
| N clinical status at diagnosis    | N0           | 1                  |         |                    |         |
|                                   | N+           | 1.25 (0.76 – 2.03) | 0.377   |                    |         |
| Metastatic presentation           | Synchronous  | 1                  |         |                    |         |
|                                   | Metachronous | 1.08 (0.66 – 1.75) | 0.767   |                    |         |
| Time from diagnosis to metastasis | < 24 months  | 1                  |         |                    |         |
|                                   | ≥ 24 months  | 1.33 (0.74 – 2.40) | 0.342   |                    |         |
|                                   | ≤ 3          | 1                  |         |                    |         |

|                                                                    |          |                    |       |                    |       |
|--------------------------------------------------------------------|----------|--------------------|-------|--------------------|-------|
| Number of metastatic lesions at metastatic presentation            | > 3      | 1.09 (0.66 – 1.80) | 0.744 |                    |       |
| Lung metastatic lesion                                             | No       | 1                  |       |                    |       |
|                                                                    | Yes      | 0.91 (0.50 – 1.68) | 0.771 |                    |       |
| Liver metastatic lesion                                            | No       | 1                  |       |                    |       |
|                                                                    | Yes      | 1.63 (0.74 – 3.59) | 0.233 |                    |       |
| Extra-pelvic node only *                                           | No       | 1                  |       |                    |       |
|                                                                    | Yes      | 0.76 (0.45 – 1.30) | 0.320 |                    |       |
| Number of residual metastatic lesions following first-line therapy | 0        | 1                  |       |                    |       |
|                                                                    | 1        | 0.67 (0.32 – 1.38) |       |                    |       |
|                                                                    | ≥ 2      | 1.25 (0.71 – 2.20) | 0.164 |                    |       |
| Local consolidative radiotherapy                                   | No (NIR) | 1                  |       | 1                  |       |
|                                                                    | Yes (IR) | 0.53 (0.32 – 0.87) | 0.011 | 0.47 (0.25 – 0.86) | 0.015 |

\* extra-pelvic nodes are the only sites of metastases. Abbreviations : NIR (no irradiation) ; IR (radiotherapy).
